# Supplementary material for: Transcriptional Heterogeneity of Tumor-Associated High Endothelial Venules Defines Inflammatory and Stress-Metabolic States with Distinct Prognostic Associations
Source: Research Square preprint supplement (doi:10.21203/rs.3.rs-8783132/v1), 2026-02-20
Supplement: Supplementary file 3 [file 5b9d1b47d606cfa74208d00e.xlsx]

## Sheet: Table S8
Table S8: Software and tools used for data analysis and visualization
Software and algorithms	Source	Identifier
R 4.2.2	R Core Team	https://www.r-project.org/
Seurat 5.2.0	(Satija et al., 2015)	https://github.com/satijalab/seurat
SeuratExtend 1.2.4	(Hua et al., 2025)	https://github.com/huayc09/SeuratExtend
Harmony 1.2.3	(Korsunsky et al., 2019)	https://github.com/immunogenomics/harmony
DoubletFinder 2.0.6	(McGinnis et al., 2019)	https://github.com/chris-mcginnis-ucsf/DoubletFinder
GSVA 1.46.0	Bioconductor	https://bioconductor.org/packages/release/bioc/html/GSVA.html
EnhancedVolcano 1.16.0	Bioconductor	https://bioconductor.org/packages/release/bioc/html/EnhancedVolcano.html
ggplot2 3.5.1	CRAN	https://cran.r-project.org/package=ggplot2
clusterProfiler 4.6.2	Bioconductor	https://bioconductor.org/packages/release/bioc/html/clusterProfiler.html
Survival 3.5-3	CRAN	https://cran.r-project.org/web/packages/
Survminer 0.5.0	CRAN	https://github.com/kassambara/survminer
CytoTRACE2 1.1.0	(Kang et al., 2024)	https://github.com/digitalcytometry/cytotrace2
monocle3 1.4.26	(Qiu et al., 2017)	https://github.com/cole-trapnell-lab/monocle3
ROGUE 1.0	(Liu et al., 2020)	https://github.com/PaulingLiu/ROGUE
ComplexHeatmap 2.14.0	Bioconductor	https://www.bioconductor.org/packages/release/bioc/html/ComplexHeatmap.html
