# Supplementary material for: Transcriptional Heterogeneity of Tumor-Associated High Endothelial Venules Defines Inflammatory and Stress-Metabolic States with Distinct Prognostic Associations
Source: Research Square preprint supplement (doi:10.21203/rs.3.rs-8783132/v1), 2026-02-20
Supplement: Supplementary file 5 [file 9694e65ebf6ec1a056610604.xlsx]

## Sheet: 시트1
Table S5: Univariate Cox regression hazard ratios for tumor-associated high endothelial venules state scores across cancer types
Cluster	Cancer	HR	CI_lower	CI_upper	p-value
cluster0	BRCA	0.889428	0.751689	1.05241	0.172269
cluster0	COAD	0.9982	0.81981	1.21541	0.985693
cluster0	ESCA	1.1422	0.893795	1.45963	0.287963
cluster0	HNSC	1.16804	1.01632	1.34241	0.02867
cluster0	KIRC	1.07998	0.923187	1.2634	0.336373
cluster0	LUAD	1.09371	0.955327	1.25215	0.194344
cluster0	LUSC	1.17467	1.01756	1.35604	0.027979
cluster0	PAAD	1.253	1.03777	1.51288	0.019003
cluster0	SKCM	0.998583	0.868946	1.14756	0.984054
cluster0	STAD	1.18041	1.00903	1.38091	0.038242
cluster0	THCA	1.31394	0.900224	1.9178	0.157022
cluster1	BRCA	0.897923	0.765433	1.05334	0.186198
cluster1	COAD	1.05144	0.867538	1.27432	0.609097
cluster1	ESCA	0.922273	0.743948	1.14334	0.460472
cluster1	HNSC	0.802264	0.696144	0.924562	0.002339
cluster1	KIRC	0.692878	0.602351	0.797011	2.81e-07
cluster1	LUAD	0.940956	0.816137	1.08486	0.401942
cluster1	LUSC	1.12169	0.978158	1.28629	0.100208
cluster1	PAAD	1.18955	0.979123	1.44521	0.080542
cluster1	SKCM	0.894854	0.774262	1.03423	0.132511
cluster1	STAD	1.15046	0.986724	1.34137	0.07356
cluster1	THCA	1.35372	0.80791	2.26828	0.25014
cluster5	BRCA	0.909063	0.767998	1.07604	0.267795
cluster5	COAD	1.07287	0.881007	1.30653	0.484104
cluster5	ESCA	1.40273	1.10292	1.78402	0.005807
cluster5	HNSC	1.12428	0.981373	1.28799	0.091244
cluster5	KIRC	1.20788	1.04081	1.40178	0.012899
cluster5	LUAD	1.1211	0.970244	1.29541	0.121074
cluster5	LUSC	1.10112	0.960646	1.26213	0.166556
cluster5	PAAD	1.18025	0.973407	1.43104	0.091837
cluster5	SKCM	0.967006	0.834687	1.1203	0.654955
cluster5	STAD	1.07454	0.921295	1.25328	0.359781
cluster5	THCA	1.34445	0.822984	2.19633	0.237214
cluster6	BRCA	0.932964	0.790635	1.10091	0.411301
cluster6	COAD	1.14807	0.944324	1.39577	0.165975
cluster6	ESCA	0.993605	0.793295	1.24449	0.955459
cluster6	HNSC	1.05425	0.916442	1.21277	0.459836
cluster6	KIRC	1.23347	1.0427	1.45915	0.014374
cluster6	LUAD	1.05052	0.914824	1.20633	0.484939
cluster6	LUSC	1.11383	0.968757	1.28063	0.129988
cluster6	PAAD	1.09219	0.891508	1.33804	0.394606
cluster6	SKCM	0.974562	0.850157	1.11717	0.711533
cluster6	STAD	1.21459	1.02894	1.43372	0.021614
cluster6	THCA	1.39787	0.826645	2.36382	0.21142
cluster12	BRCA	0.778082	0.659597	0.917851	0.002911
cluster12	COAD	0.980516	0.815679	1.17866	0.834034
cluster12	ESCA	1.12068	0.922093	1.36204	0.25224
cluster12	HNSC	0.911275	0.795046	1.0445	0.182006
cluster12	KIRC	1.05573	0.909488	1.22548	0.475939
cluster12	LUAD	0.854518	0.741854	0.984292	0.029298
cluster12	LUSC	1.03467	0.899848	1.18969	0.632318
cluster12	PAAD	1.224	1.00334	1.49319	0.04628
cluster12	SKCM	0.701148	0.606135	0.811054	1.76e-06
cluster12	STAD	1.10783	0.946612	1.2965	0.201889
cluster12	THCA	0.675182	0.380551	1.19792	0.179387
Inflammatory_HEV_score	BRCA	0.815511	0.689909	0.96398	0.016855
Inflammatory_HEV_score	COAD	1.01068	0.841663	1.21364	0.9094
Inflammatory_HEV_score	ESCA	1.06572	0.864154	1.31429	0.551826
Inflammatory_HEV_score	HNSC	0.919927	0.795006	1.06448	0.262355
Inflammatory_HEV_score	KIRC	0.889588	0.773995	1.02244	0.099471
Inflammatory_HEV_score	LUAD	0.948744	0.823087	1.09358	0.467927
Inflammatory_HEV_score	LUSC	1.14019	0.990523	1.31247	0.06765
Inflammatory_HEV_score	PAAD	1.26064	1.03949	1.52883	0.018598
Inflammatory_HEV_score	SKCM	0.810932	0.702696	0.935839	0.004141
Inflammatory_HEV_score	STAD	1.20165	1.02156	1.41348	0.026588
Inflammatory_HEV_score	THCA	1.16983	0.730235	1.87406	0.514148
Stress_metabolic_HEV_score	BRCA	0.895666	0.756448	1.06051	0.201113
Stress_metabolic_HEV_score	COAD	1.14702	0.944438	1.39305	0.16654
Stress_metabolic_HEV_score	ESCA	1.21462	0.95663	1.54218	0.110488
Stress_metabolic_HEV_score	HNSC	1.12958	0.983708	1.29709	0.084143
Stress_metabolic_HEV_score	KIRC	1.30585	1.11554	1.52863	0.000899
Stress_metabolic_HEV_score	LUAD	1.10688	0.963344	1.2718	0.151868
Stress_metabolic_HEV_score	LUSC	1.1408	0.994145	1.30909	0.06061
Stress_metabolic_HEV_score	PAAD	1.19394	0.972091	1.46643	0.091012
Stress_metabolic_HEV_score	SKCM	0.960081	0.833524	1.10585	0.572176
Stress_metabolic_HEV_score	STAD	1.19771	1.01986	1.40658	0.027825
Stress_metabolic_HEV_score	THCA	1.47852	0.87495	2.49846	0.144045
