# Supplementary material for: Transcriptional Heterogeneity of Tumor-Associated High Endothelial Venules Defines Inflammatory and Stress-Metabolic States with Distinct Prognostic Associations
Source: Research Square preprint supplement (doi:10.21203/rs.3.rs-8783132/v1), 2026-02-20
Supplement: Supplementary file 7 [file b58a0c37743b57ca69bcbe9f.xlsx]

## Sheet: Table S1
Table S6: Single-cell RNA-seq data sources and sample information
Data Accession	Source	Cancer type	Patient n	Tumor sample n	Total cells n	Endothelial cells n	Venous cells n
GSE183904	(Kumar V et al., 2021)	STAD	26	26	119878	4197	2327
GSE167297	(Jeong HY et al., 2021)	STAD	5	10	20339	869	577		STAD	Stomach adenocarcinoma
GSE176078	(Wu SZ et al., 2021)	BRCA	26	26	100064	6282	3982		BRCA	Breast invasive carcinoma
GSE161529	(Pal B et al., 2021)	BRCA	36	36	247881	2608	1171		CRC	Colorectal Cancer
GSE132465	(Lee HO et al., 2020)	CRC	23	23	47285	731	323		ESCA	Esophageal carcinoma
GSE188711	(Guo W et al., 2021)	CRC	6	6	26492	316	110		THCA	Thyroid carcinoma
GSE160269	(Zhang X et al., 2021)	ESCA	60	60	192078	10261	5957		NSCLC	Non-small cell lung cancer
GSE184362	(Pu W et al., 2021)	THCA	7	7	65580	1351	639		MELA	Melanoma
GSE148071	(Wu F et al., 2021)	NSCLC	42	42	60288	650	233		cSCC	Cutaneous squamous cell carcinoma
GSE131907	(Kim N et al., 2020)	NSCLC	11	11	45147	619	301		PAAD	Pancreatic Adenocarcinoma
GSE277165	(Stuvenboll A et al., 2025)	MELA	10	10	132464	6737	4190		HNSC	Head and neck squamous cell carcinoma
GSE144236	(Ji, A. L. et al., 2020)	cSCC	10	10	26299	171	68		RCC	Renal cell carcinoma
GSE155698	(Steele NG et al., 2020)	PAAD	16	16	42272	201	66
GSE164690	(Kürten CHL et al., 2021)	HNSC	15	15	42449	8382	2240
GSE172577	(Peng Y et al., 2021)	HNSC	6	6	58050	730	309
GSE178481	(Alchahin AM et al., 2022)	RCC	8	13	100916	3643	1739
*Note: cell numbers represent counts after quality control and preprocessing
