# Supplementary material for: Transcriptional Heterogeneity of Tumor-Associated High Endothelial Venules Defines Inflammatory and Stress-Metabolic States with Distinct Prognostic Associations
Source: Research Square preprint supplement (doi:10.21203/rs.3.rs-8783132/v1), 2026-02-20
Supplement: Supplementary file 8 [file ebdb1ef27e6b491cdc09cd23.xlsx]

## Sheet: Sheet1
Table S7: Gene lists applied in module scoring analysis
Score	Gene set
HEV signature	"C1S", "IL2RG", "CSF2RB", "CHST4", "FUT7", "LIPG", "LIFR", "ENPP2", "CH25H", "C4BPA", "ENPP6", "CXCL13", "CCL19", "CCL21", "MADCAM1", "NTAN1", "VCAM1", "ICAM1", "LRG1", "VWF", "SELE", "SELP", "ACKR1", "NR2F2", "ST3GAL6", "ST3GAL4", "B4GALT1", "B4GALT6", "GCNT1", "B3GNT3", "FUT4", "CHST2", "CXCL10", "CXCL9"
MHC class II	"CD74", "HLA-DMA", "HLA-DMB", "HLA-DOA", "HLA-DOB", "HLA-DPA1", "HLA-DPB1", "HLA-DQA1", "HLA-DQA2", "HLA-DQB1", "HLA-DQB2", "HLA-DRA", "HLA-DRB1", "HLA-DRB3", "HLA-DRB4"
Antigen processing	"IFI30", "CTSD", "CTSE", "CTSL", "CTSV", "CTSS", "DNM2", "PIKFYVE", "FCER1G", "FCGR2B", "HLA-DMA", "HLA-DMB", "HLA-DOA", "HLA-DOB", "HLA-DPA1", "HLA-DPB1", "HLA-DQA1", "HLA-DQA2", "HLA-DQB1", "HLA-DQB2", "HLA-DRA", "HLA-DRB1", "HLA-DRB3", "HLA-DRB4", "HLA-DRB5", "LGMN", "B2M", "TRAF6", "UNC93B1", "CTSF", "CD74"
Response to heat stress	"FKBP4", "CREBBP", "NUP160", "HSPA5", "TPR", "CAMK2B", "NDC1", "NUP133", "CAMK2A", "NUP37", "HSP90AA1", "GSK3B", "SEH1L", "NUP50", "HDAC6", "AAAS", "NUP188", "HSP90AB1", "SIRT1", "MAPK1", "ST13", "EP300", "RAE1", "MAPK3", "NUP93", "GML", "DNAJC2", "DNAJB6", "HSPB1", "RPA3", "RLN1", "BAG1", "NUP88", "YWHAE", "CRYAB", "HSPA8", "NUP98", "PTGES3", "NUP107", "MRPL18", "BAG2", "HSPA9", "NUP155", "RPA2"…
Response to unfolded protein	"AKT3","BCL2L11","OPTN","PIGBOS1","STUB1","ABCA7","RACK1","CREB3","AGR2","ERN2","OS9","TMED2","COPS5","EDEM2","FICD","PACRG","ATF6B","ASB11","CTH","DAB2IP","CREBRF","DAXX","DDIT3","BHLHA15","EIF2S1","AKT1","AKT2","ERN1","ATF6","UFL1","ABCB10","PPP1R15A","FUT1","HSPB8","TBL2","AMFR","BBC3","SERP1","ERLEC1","ERO1A","HSF1","HSPA1A","HSPA5","HSPD1","SERP2","MIR199A1","DNAJB9","ATF3","ATF4","NCK1","NF…
Oxidative phosphorylation	"ABCB7", "ACAA1", "ACAA2", "ACADM", "ACADSB", "ACADVL", "ACAT1", "ACO2", "AFG3L2", "AIFM1", "ALAS1", "ALDH6A1", "ATP1B1", "ATP5F1A", "ATP5F1B", "ATP5F1C", "ATP5F1D", "ATP5F1E", "ATP5PB", "ATP5MC1", "ATP5MC2", "ATP5MC3", "ATP5PD", "ATP5ME", "ATP5PF", "ATP5MF", "ATP5MG", "ATP5PO", "ATP6AP1", "ATP6V0B", "ATP6V0C", "ATP6V0E1", "ATP6V1C1", "ATP6V1D", "ATP6V1E1", "ATP6V1F", "ATP6V1G1", "ATP6V1H", "BAX"…
ATP metabolic process	"MIR675","DNM1L","ABCC9","SLC25A13","ATP5PD","ATP5MG","CLPX","NUDT5","SLC2A6","TREX1","SLC25A25","NDUFA11","COL6A1","ATPSCKMT","COX11","PARP1","CTNS","PRXL2C","FLCN","ENO1","ENO2","ENO3","AK1","EP300","AK2","AK4","FBP1","FOXK1","ALDOA","ALDOB","ALDOC","BCL2L13","MTCH2","MTOR","MFSD8","GALK1","LETMD1","GAPDH","ZBTB20","BLOC1S6","AK5","GAPDHS","GCK","NUPR1","ATP5MGL","AMPD2","DMAC2L","GPD1","GPI","…
